1 **MSAP in Tiger Snakes: Island populations are epigenetically more divergent.**

2 Carlos Marcelino Rodríguez López<sup>1</sup>, Moumouni Konate<sup>1</sup>, Vicki Thomson<sup>2</sup>.

3 Author affiliation: 1. Environmental Epigenetics and Genetics Group, Plant Research  
4 Centre, School of Agriculture, Food and Wine, University of Adelaide, Waite  
5 Campus, PMB1 Glen Osmond, SA 5064, Australia; 2. School of Biological Sciences,  
6 University of Adelaide, Adelaide, SA 5000.

7

8 **Abstract:**

9 Research on changes in phenotypic plasticity within wild animal populations  
10 is centuries old, however far fewer studies have investigated the role that epigenetics  
11 play in the development or persistence of natural variation in response to  
12 environmental change. Tiger snakes (*Notechis scutatus*) are an ideal study organism  
13 to investigate the link between epigenetics and phenotypic responses to environmental  
14 change, as they live on a range of offshore islands with different environments and  
15 prey types while exhibiting gigantism and dwarfism in body and head size. In this  
16 study, we have generated methylation sensitive amplified polymorphism (MSAP) data  
17 and found that, in general, Tiger Snakes are more epigenetically differentiated than  
18 genetically differentiated. Each island group has a distinctive epigenetic signal,  
19 suggesting the Tiger Snakes on each island group have adapted to their specific  
20 environment. This is also supported by the strong positive relationship between  
21 epigenetic differentiation and isolation age, as well as between epigenetic/genetic  
22 signal and both temperature and precipitation. The Tiger Snakes from Kangaroo  
23 Island, which has a complex landscape/environment like the mainland rather than the  
24 simple landscape/environment of each of the smaller islands, are both genetically and

25 epigenetically more like the mainland. As the MSAP loci are randomly distributed  
26 across the genome, we believe a closer examination of the epigenetic modifications  
27 near genes involved in growth, development, and lipid metabolism will allow us to  
28 investigate the epigenetic basis for the natural variation in head size and body size on  
29 the islands.

30

### 31 **Introduction:**

32 Evolutionarily adaptive responses in animals take place through a complex set  
33 of mechanisms that includes physical traits, behaviour, and environment but also the  
34 genes encoding for these characteristics and their epigenetic regulation. It has long  
35 been hypothesised that important fitness traits across a species, such as variation in  
36 body size and the tolerance of aridity and heat, may not be hard-wired in the DNA,  
37 but rather influenced by epigenetic modification to the DNA backbone that allows  
38 immediate responses to environmental cues (Feinberg & Irizarry 2011). Thus the  
39 phenotype of an organism appears to be influenced by epigenetic markers to some  
40 degree, with aberrations in these mechanisms creating variation that can lead both to  
41 adaptive and maladaptive traits (Consuegra and Rodriguez Lopez, 2016). DNA  
42 methylation is the best, and most easily, characterized epigenetic modification, and  
43 one that has been demonstrated to remain stable through the germline (Jablonka &  
44 Raz 2009).

45 Little is known about epigenetic variation in wild populations, how it is  
46 generated and how it relates to phenotypic plasticity. Island populations provide a  
47 source of natural variation, which can be used to assess naturally occurring epigenetic  
48 variation. An ideal species for examining epigenetic variation in animals in the  
49 Australian context is the Tiger Snake, as it occurs on multiple offshore islands that

50 have been isolated for varying amounts of time. The isolation of Tiger Snakes on  
51 Australia's offshore islands stem from both sea-level rise after the last glacial  
52 maximum (6-14,000 years ago [ya]) and the transport and release of captive  
53 populations by humans ~100 ya. In the recently isolated populations, neonate Tiger  
54 Snakes can adjust their head size to suit prey size (Aubret & Shine 2009), suggesting  
55 an epigenetic regulation of growth genes. Whereas on island populations with large  
56 prey items separated for thousands of years, the Tiger Snakes are born, and/or develop  
57 into, giant-sized snakes (Shine 1987), suggesting the traits governing body/head  
58 gigantism have been genetically assimilated. This well-characterised phenotypic  
59 plasticity makes the Tiger Snake an ideal wild species to investigate the link between  
60 epigenetic gene regulation and phenotypic plasticity.

61 In this study, we use methylation sensitive amplified polymorphism (MSAP)  
62 to characterise the differences in methylation between Tiger Snake populations and  
63 correlate with various population characteristics, such as geographic distance between  
64 populations, isolation age, and bioclimatic variables.

65

## 66 **Methods:**

### 67 DNA extractions

68 A total of 70 samples were obtained from the Australian Biological Tissue  
69 Collection (ABTC) at the South Australian Museum (SAM) or from the Australian  
70 National Wildlife Collection (ANWC) at the Commonwealth Scientific and Industrial  
71 Research Organisation (CSIRO). Sample geographic origin was determined from the  
72 specimen voucher information. In brief, a total of 38 samples were originally  
73 collected from island populations, including Kangaroo Island, Chappell Island, Nuyts  
74 Archipelago (Goat, Franklin and St Peter Islands) and Sir Joseph Banks Islands

75 (Roxby Island, Reevesby Island and Hareby Islands) while 32 samples were from  
76 continental populations (for detailed information see Supplementary Table 1). DNA  
77 was extracted from the tissue samples using either a ‘salting-out’ method (Nicholls *et*  
78 *al.* 2000) or a DNeasy Blood and Tissue kit (Qiagen).

79

## 80 Amplified Fragment Length Polymorphism (AFLP) and Methylation Sensitive

### 81 Amplification Polymorphism (MSAP) Profiling

82 AFLP and MSAP methods were adapted from (Rodriguez Lopez *et al.* 2012).  
83 Briefly, 5.5 µl of the normalized gDNA were used for parallel DNA restriction and  
84 ligation performed using a combination of restriction enzyme *EcoRI* and *MseI* for  
85 AFLPs and *EcoRI* and one of two isoschizomers *MspI* or *HpaII* for MSAPs. DNA  
86 was added to 5.5 µl the Restriction/Ligation master mix containing: 1.1 µl T4 Ligase  
87 buffer (x10), 1.1 µl NaCl (0.5 M), 0.55 µl BSA (1 mg/ml), 1U *MseI* (New England  
88 Biolabs) or *HpaII* (New England Biolabs) or *MspI* (New England Biolabs), 5U *EcoRI*  
89 (New England Biolabs), 20U T4 DNA Ligase (New England Biolabs), 1 µl *EcoRI*  
90 adapter (5 µM), 1 µl *HpaII/MspI* adapter (50 µM) or 1 µl *MseI* adapter (50 µM) (See  
91 Table 1 for full sequences), and water to a final reaction volume of 11 µl.  
92 Restriction/Ligation was performed using a T100<sup>TM</sup> Thermo cycler (Bio-Rad  
93 Laboratories, Hercules, CA) with the following protocol: 2 h at 37 °C followed by 10  
94 min at 65 °C.

95 For the pre-amplification step, 1 µl of each Restriction/Ligation reaction  
96 product was added to 11.5 µl of pre-amplification master mix containing: 6.25 µl 2x  
97 Biomix (Bioline), 0.25 µl *HpaII/MspI* pre-amplification primer (10 µM) or 0.25 µl  
98 *MseI* pre-amplification primer (10 µM), 0.5 µl *EcoRI* pre-amplification primer (10  
99 µM) (Table 1), 0.1 µl BSA (1 mg/ml) and 4.85 µl Water. PCR amplification was

100 performed using a T100<sup>TM</sup> Thermo cycler (Bio-Rad Laboratories, Hercules, CA) with  
101 the following protocol: 2 min at 72 °C, followed by 30 cycles of 30 sec at 94 °C, 30  
102 sec at 56 °C, 2 min at 72 °C with a final step of 10 min at 72 °C.

103 A second round of selective amplification was carried out by adding 1 µl of  
104 the Pre-amplification PCR product to 11.5 µl of the Selective amplification Master  
105 mix containing: 6.25 µl 2x Biomix (Bioline), 0.25 µl 5'-FAM labelled *HpaII/MspI*  
106 Selective primer (10 µM) or 0.25 µl 5'-FAM labelled *MseI* Selective primer (10 µM),  
107 0.5 µl *EcoRI* Selective primer (10 µM) (Table 1), 0.1 µl BSA (1 mg/ml) and 4.85 µl  
108 nanopure water. PCR amplification was performed using a T100<sup>TM</sup> Thermo cycler  
109 (Bio-Rad Laboratories, Hercules, CA) with the following protocol: 2 min at 94 °C,  
110 followed by 13 cycles of 30 sec at 94 °C, 30 sec at 65 °C (reduce by 0.7 °C per cycle),  
111 2 min at 72 °C, followed by 24 cycles of 30 sec at 94 °C, 30 sec at 56 °C, 2 min at  
112 72 °C with a final step of 10 min at 72 °C. Selective amplification products were sent  
113 for capillary electrophoresis separation to the Australian Genome Research Facility  
114 Ltd (AGRF), Adelaide, South Australia.

115

#### 116 Statistical analysis

117 MSAP profiles were visualized using GeneMapper Software v4 (Applied  
118 Biosystems, Foster City, CA). Binary matrices containing presence (1) absence (0)  
119 allelic information were generated from the capillary separation results obtained from  
120 samples restricted using enzyme combinations *EcoRI/MseI* (AFLPs) and *EcoRI/MspI*  
121 and *EcoRI/HpaII* (MSAPs). In this case, fragment selection was limited to allelic  
122 sizes between 85 and 550 bp to reduce the potential impact of size homoplasy  
123 (Caballero *et al.* 2008). In all cases, different levels of hierarchy were generated to  
124 group the samples. Samples were first grouped into continental or island populations.

125 Then, samples from island populations were divided according to the island they were  
126 collected from. Finally, samples from island populations were separated by island age.

127 The numbers of the various fragments attributed to non-methylated (+/+),  
128 CHG methylated (+/-), CG methylated (-/+), and uninformative (-/-) were calculated  
129 for each population based on the MSAP profiles. Shannon Diversity indices were  
130 used to estimate the within-population (at the island group level) epigenetic diversity  
131 ( $H_{pop}$ ) of the CG and CHG methylation patterns and the Kruskal-Wallis H test was  
132 used to estimate the significance of the differences in Shannon diversity index among  
133 these populations.

134 For the analysis of the AFLP and MSAP data, GenAlex v6.5 software (Peakall  
135 & Smouse 2012) was used to infer pairwise genetic (PhiPT calculated from AFLP  
136 profiles) and epigenetic (ePhiPT calculated from MSAP profiles) distances between  
137 the different hierarchical groups described above. Analysis of Molecular Variance  
138 (AMOVA) was then performed using the same software to test the significance of the  
139 estimated distances between groups using 9999 random permutations. Principal  
140 Coordinates Analysis (PCoA) was used to visualize the patterns of epigenetic  
141 variation associated to geographical origin and island age. The PCoA were performed  
142 in the R package 'stats' using the prcomp command.

143 Mantel test analyses were then used to estimate the correlation between: 1) the  
144 calculated pairwise molecular distances (i.e. PhiPT and ePhiPT) and the pairwise  
145 geographic distance in km (GGD) among populations and 2) the calculated pairwise  
146 molecular distances (i.e. PhiPT and ePhiPT) and the pairwise age differences among  
147 populations as described by Rois *et al.* (2013). Mantel test significance was assigned  
148 as the probability of the correlation between compared matrices using random data  
149 being higher than the correlation between matrices of collected data (i.e.  $P(r_{xy-rand}$

150 >= rxy-data)) estimated over 9,999 random permutations tests, as implemented in  
151 Genalex v6.5.

## 152 Climate

153         The 19 bioclim layers were downloaded from the worldclim website  
154 (worldclim.org/bioclim), converted from tiff to ascii files and trimmed to focus on  
155 Australia using the R computing package Raster. The values of the 19 bioclim layers  
156 for each of the South Australia sample locations used in this study were extracted  
157 from the climate data and input into a principal component analysis (PCA) to examine  
158 how each population varies in overall climate. Mantel test analyses (R package ade4)  
159 were also used to estimate the correlation between differences in epigenetic/genetic  
160 principal components (i.e. PC1 of the MSAP PCoA) and each of the 19 bioclimatic  
161 variables for the sampling locations within South Australia (where most of the  
162 samples were collected from) and converted to a distance matrix. The relationships  
163 between these raw datasets were also plotted with regression lines and Pearson  
164 correlation coefficients were calculated to estimate the strength of these relationships  
165 using the R package 'stats'.

166

## 167 **Results:**

168         67 Tiger Snake samples were successfully genotyped, with 38 from island  
169 populations and 29 from mainland Australia. As there were not enough successfully  
170 genotyped samples from some locations to generate population level data, the  
171 majority of analyses were performed on samples from South Australia: the Nuyts  
172 Archipelago (n=12), Sir Joseph Banks Island group (n=11), Kangaroo Island (n=7)  
173 and the South Australian mainland (n=17; see Figures 1 & 2 for sampling locations).

174 The numbers of the various fragments attributed to non-methylated (+/+),  
175 CHG methylated (+/-), CG methylated (-/+), and uninformative (-/-) were calculated  
176 for the mainland populations and island populations separately based on the MSAP  
177 profiles. Within South Australia (SA), the total 5'-CCGG-methylation level (both CG  
178 and CHG together) ranged from 22% (of fragments) in mainland SA Tiger Snakes to  
179 30% on Roxby Island (Table 2 & Figure 3). The amongst SA population difference in  
180 overall genome-wide methylation levels (both CG and CHG methylation together)  
181 was not significant (ANOVA  $p = 0.6270$ ), nor was the difference in CHG methylation  
182 between SA populations (ANOVA  $p = 0.1637$ ); however the difference in CG  
183 methylation between each of the SA populations was significant at the 5% level  
184 (ANOVA  $p = 0.0341$ ; range from 10% of fragments on Goat Island to 17% on Roxby  
185 Island; Table 2). Shannon diversity indices were calculated for each methylation type  
186 per SA population group (Table 3) and Kruskal-Wallis rank sum tests were used to  
187 test for differences between Tiger Snakes on the SA mainland and each of the island  
188 groups, which were significantly different at the 10% level for CG methylation (chi-  
189 squared = 2.9503,  $p = 0.08586$ ), and for CHG methylation (chi-squared = 3.3103,  $p =$   
190 0.06884). The coefficient of epigenetic differentiation was also higher in the SA  
191 mainland populations compared to the SA island populations (Table 4.)

## 192 **Genetics**

193 The genetic PCoA shows that some Kangaroo Island Tiger Snake samples are  
194 genetically closer to mainland samples, while others are genetically closer to island  
195 populations (Figures 4 & 5). Within SA the populations that are genetically closest to  
196 each other are the Sir Joseph Banks Island group and Nuyts Archipelago populations  
197 (Nei genetic distance = 0.031;  $\Phi_{iPT} = 0.041$ ; Table 5) and they appear intertwined  
198 on the PCoA (Figure 5). Using Nei's genetic distance, the Kangaroo Island and



199 mainland Tiger Snakes are also genetically quite close (Nei genetic distance = 0.034;  
200 PhiPT = 0.024), with the most genetically distant populations the mainland-Nuyts  
201 Archipelago populations (Nei genetic distance = 0.072; PhiPT = 0.166).

## 202 **Epigenetics**

203 The populations that are epigenetically closest to each other are the mainland/KI  
204 populations (using both Nei's and PhiPT epigenetic distance for the HpaII dataset)  
205 and the Sir Joseph Banks/Nuyts Archipelago populations (Nei's and PhiPT epigenetic  
206 distance for the MspI dataset; Tables 6 & 7). The populations that are epigenetically  
207 most distant are the Sir Joseph Banks islands vs. mainland (*MspI* PhiPT epigenetic  
208 distance) and the Sir Joseph Banks islands vs. all the other populations (*HpaII* PhiPT  
209 epigenetic distance). The Sir Joseph Banks Island group are comprised of Roxby  
210 Island, Reevesby Island and Hareby Islands, which each also had the three highest  
211 overall percentages of fragments that were methylated (Table 3). The epigenetic  
212 PCoA of all Tiger Snake samples, again shows how some Kangaroo Island samples  
213 resemble those on the mainland, but others resemble those on the smaller nearby  
214 islands (Figure 6).

215 When only South Australian (SA) Tiger Snakes were examined, the SA  
216 mainland samples overlapped to a large degree with those on Kangaroo Island and  
217 were quite distinct from those on the Nuyts Archipelago and Sir Joseph Banks Island  
218 group in PC1 (Figure 7). Values in PC2, on the other hand, separated islands from the  
219 Nuyts Archipelago from those in the Sir Joseph Banks Island group, with the  
220 mainland and Kangaroo Island populations in between (Figure 8).

221 There is also strong correlation ( $R^2 = 0.4797$  in Figure 9) between genetic  
222 distance and geographic distance (traditionally termed isolation-by-distance), however  
223 the correlation between epigenetic distance and geographic distance is stronger ( $R^2 =$

224 0.5468 in Figure 10). An even stronger correlation also occurs between epigenetic  
225 distance and isolation age ( $R^2 = 0.5673$  in Figure 11 and  $R^2 = 0.6922$  in Figure 12).

226

### 227 **Environmental data**

228       There are some clear environmental differences between some of the Tiger  
229 Snake populations (Figures 13 & 14). The two main bioclimatic variables driving the  
230 PCA relationships between the populations are BIO4 (temperature seasonality) and  
231 BIO12 (annual precipitation). When we look at how these bioclimatic variables are  
232 related to epigenetic distance, we find that similar to the strong correlation between  
233 epigenetic distance and isolation age, there are also even stronger correlations  
234 between epigenetic distance and bioclimatic variables for the South Australian (SA)  
235 samples. The SA mainland samples generally experience higher annual mean  
236 temperatures ( $\sim 15.7$ — $17.3$  °C) compared to Tiger Snakes on the Nuyts Archipelago  
237 and Sir Joseph Banks islands ( $\sim 13.5$ — $16.3$  °C), which appears to be strongly related  
238 ( $r = 0.652$ ) to their genetic/epigenetic profiles (*HpaII* PCoA1 values; Figure 15 & 16).  
239 The SA mainland samples generally experience lower precipitation levels in the driest  
240 month ( $< \sim 12$ mm) compared to Tiger Snakes on the Nuyts Archipelago and Sir  
241 Joseph Banks islands ( $> \sim 12$ mm), which again appears to be strongly related ( $r = -$   
242  $0.711$ ) to their genetic/epigenetic profiles (*HpaII* PCoA1 values; Figures 17 & 18).  
243 Other bioclimatic variables related to mean temperature and precipitation levels are  
244 also strongly associated with PC1 in the *HpaII* PCoA, however Bio1 and Bio14 have  
245 the strongest correlation (Table 8).

246

### 247 **Discussion:**

248           The MSAP technique only detects methylation at 5'-CCGG-3' sites and  
249 cannot discriminate between methylation and fragment absence when both cytosines  
250 are hypermethylated: therefore the level of genomic DNA methylation may be  
251 underestimated. The *HpaII* and *MspI* datasets also have the added limitation of  
252 possibly still retaining some genetic signal, which complicates the epigenetic patterns.  
253 Bearing in mind these inherent limitations of the technique, our study has explored the  
254 level and pattern of genome-wide 5'-CCGG-methylation in Tiger Snake island and  
255 mainland populations.

256           When we compare the purely nuclear fragment length (AFLP) data, we see  
257 similar patterns to that observed in mtDNA (Keogh et al. 2005): kangaroo island  
258 Tiger Snakes fall with SA mainland samples and sister to some of the island samples  
259 (Sir Joseph Banks Island group). The epigenetic (*HpaII*) data adds an extra dimension  
260 to the information about the Kangaroo Island Tiger Snakes, in that they look like  
261 mainland populations both genetically (AFLP) and epigenetically (*HpaII*). This could  
262 be because of the relatively large size of the island and/or the complex  
263 climate/habitat/prey types etc. The low levels of within-population epigenetic  
264 diversity on KI suggests that even given the more complex island environment, the  
265 Tiger Snakes on KI have all responded epigenetically in a similar way to each other  
266 and to those on the mainland. A large complex environment may allow enough  
267 heterogeneous habitats that behavioural adaptation (*i.e.* via migration to new  
268 environments) is favoured over epigenetic *in-situ* adaptation that is the only option in  
269 range and environmentally restricted habitats, such as those that occur on small  
270 isolated islands.

271           There is more epigenetic differentiation within the mainland population as a  
272 whole compared to that within the islands as a group again possibly because the

273 environment on the mainland is more heterogeneous than across the islands (Table 5).  
274 Another suggestion that the epigenetic signal is related to complex environmental  
275 differences is the fact that the Nuyts Archipelago and Sir Joseph Banks Island group  
276 are similar genetically to each other but significantly different in epigenetic signal  
277 even though they have been isolated for similar amounts of time and from presumably  
278 the same source population (Table 4, 6 & 7).

279         Even taking into account some retained genetic signal in PC1 of the *HpaII*  
280 PCoA plots, these plots show interesting patterns: 1) the SA mainland populations are  
281 quite distinct from the Nuyts Archipelago and Sir Joseph Banks islands in PC space,  
282 which is not seen in the purely genetic data; 2) the intra-population variation (*i.e.*  
283 degree of clustering of each island population) is smaller in the epigenetic PCoA than  
284 in the genetic PCoA; and 3) the correlation between epigenetic and geographic  
285 distance is stronger than between genetic and geographic distance. If there is retained  
286 genetic signal within PC1 of the *HpaII* PCoA (and of a similar nature to the genetic  
287 signal in the AFLP PCoA), then this retained genetic signal would in essence be  
288 adding noise to the epigenetic signal, suggesting the purely epigenetic signal should  
289 exhibit stronger separation between the mainland and island populations, even less  
290 intra-population variation in the island populations and stronger correlation between  
291 epigenetic distance and geographic distance than that observed. Unless the *HpaII* cut  
292 sites present in this data occur purely by coincidence in adaptive genes, then these  
293 patterns suggest that the island populations have adapted through epigenetic  
294 mechanisms to their specific environments.

295         This idea of Tiger Snake adaptation to specific environments epigenetically is  
296 further reinforced by the very strong correlation between PC1 in the *HpaII* PCoA with  
297 various temperature and precipitation bioclimatic variables. The size of each island,

298 as well as the habitat and climate, all possibly play a role in how adaptable the Tiger  
299 Snakes need to be in terms of life history traits. There are distinct and quite different  
300 ecological niches on the islands of the Nuyts Archipelago and the Sir Joseph Banks  
301 Island group (colder and with more rain) compared to the mainland (warmer and with  
302 less rain). The islands of the Sir Joseph Banks Island group and Nuyts Archipelago  
303 are also generally small in size, with low profiles and little natural water (Robinson *et*  
304 *al.* 1996), suggesting that uncharacteristically hot and dry seasons might have a larger  
305 impact on the habitat and prey items of the Tiger Snakes on these islands.  
306 Furthermore, on small islands, Tiger Snakes may need to retain flexibility in  
307 body/head size development strategies in order to adapt to rapid and uncommon  
308 weather events, as well as in changes in habitat and/or prey as they can't simply  
309 migrate to follow their preferred niche and prey items. For example, if seasonal  
310 storms wipe out mutton-bird nests, a lack of large high calorie prey items at a critical  
311 time of year may result in only small reptiles being available for neonates as they  
312 develop in their first year of age, with reduced gigantism one possible outcome  
313 through epigenetic down-regulation of growth genes.

314         Interestingly, a strong correlation occurs between epigenetic distance (PhiPT  
315 in *HpaII*) and isolation age. This is counter-intuitive if epigenetic regulation of traits  
316 develops over short time frames and then these traits get genetically assimilation over  
317 longer time frames. Another possible explanation for this correlation between  
318 epigenetic distance and isolation age is that the retained genetic signal has been  
319 subject to neutral genetic drift, which might also appear as increasing epigenetic  
320 differentiation relative to isolation time. The fact that Tiger Snake epigenetic patterns  
321 are not that similar to the purely genetic patterns makes neutral drift an unlikely  
322 explanation however. Neutral drift has been posited as one explanation for significant

323 correlation between genetic and epigenetic patterns in another MSAP study of wild  
324 animal populations, however they suggest that methylation variation being dependent  
325 on DNA sequence differences is a more likely explanation (Liu 2012). In the case of  
326 the Tiger Snake, the environmental variability found on the SA islands may be too  
327 extreme to select for a new optimal set of traits after isolation. This may necessitate  
328 continued epigenetic regulation of phenotypic plasticity over thousands of years rather  
329 than only an initial adaptive period after isolation followed by genetic assimilation as  
330 per the model explaining epigenetic regulation of genes as a method of rapid  
331 adaptation to novel environments.

332 **Conclusion:**

333 In conclusion, by randomly subsampling the genome and epigenome of the  
334 Tiger Snake we found that Kangaroo Island Tiger Snakes resemble those on the  
335 mainland both genetically and epigenetically to a large degree, possibly because both  
336 KI and the mainland are environmentally complex. More importantly, we have also  
337 shown that the SA island populations have adapted to their environment in terms of  
338 both specific temperature and precipitation levels. Future work in this sphere needs to  
339 use finer-scale methods to examine both the genetic and epigenetic signal across  
340 populations of the Tiger Snake. Furthermore, a closer examination of epigenetic  
341 regulation of specific genes involved in growth (*i.e.* for head and body size) and lipid  
342 metabolism are needed to see epigenetic differences related to prey item variance on  
343 the different islands and in comparison to the mainland Tiger Snakes.

344

345 Bibliography

- 346 Aubret F, Shine R (2009) Genetic assimilation and the postcolonization erosion of  
347 phenotypic plasticity in island Tiger Snakes. *Current Biology* 19: 1932-1936.
- 348 Caballero A, Quesada H, Rolán-Alvarez E (2008) Impact of amplified fragment  
349 length polymorphism size homoplasmy on the estimation of population genetic  
350 diversity and the detection of selective loci. *Genetics*. 179(1):539–554.
- 351 Consuegra S, Rodriguez Lopez CM (2016) Epigenetic-induced alterations in sex-  
352 ratios in response to climate change: An epigenetic trap? *Insights &*  
353 *Perspectives* 38(10):950-958.
- 354 Feinberg AP & Irizarry RA (2010) Stochastic epigenetic variation as a driving force  
355 of development, evolutionary adaptation, and disease. *PNAS* 107:1757-1764.
- 356 Jablonka E & Raz G (2009) Transgenerational epigenetic inheritance: prevalence,  
357 mechanisms, and implications for the study of heredity and evolution. *The*  
358 *quarterly review of biology* 84(2): 131-176.
- 359 Liu S, Sun K, Jiang T, Ho JP, Liu B, Feng J (2012) Natural epigenetic variation in the  
360 female great roundleaf bat (*Hipposideros armiger*) populations. *Mol Genet*  
361 *Genomics* 287:643-650.
- 362 Peakall R, Smouse PE. (2012) GenAlEx 6.5: genetic analysis in Excel. Population  
363 genetic software for teaching and research--an update. *Bioinformatics*.  
364 28(19):2537–2539.
- 365 Robinson T, Canty P, Mooney T, Rudduck P (1996) *South Australia's Offshore*  
366 *Islands*. Biological Survey South Australia, Resource Management Branch,  
367 Department of Environment and Natural Resources, South Australia.

- 368 Rodríguez López C, Morán P, Lago F, Espiñeira M, Beckmann M, Consuegra S.  
369 (2012) Detection and quantification of tissue of origin in salmon and veal  
370 products using methylation sensitive AFLPs. *Food Chem.* 131(4):1493–1498.
- 371 Róis AS, Rodríguez López CM, Cortinhas A, Erben M, Espírito-Santo D, Wilkinson  
372 MJ, et al. (2013) Epigenetic rather than genetic factors may explain  
373 phenotypic divergence between coastal populations of diploid and tetraploid  
374 *Limonium* spp. (Plumbaginaceae) in Portugal. *BMC Plant Biol.* 13:205.
- 375 Shine R (1987) Ecological comparisons of island and mainland populations of  
376 Australian Tigersnakes (*Notechis: Elapidae*) *Herpetologica* 43(2): 233-240.  
377  
378



379 **Tables and Figures**

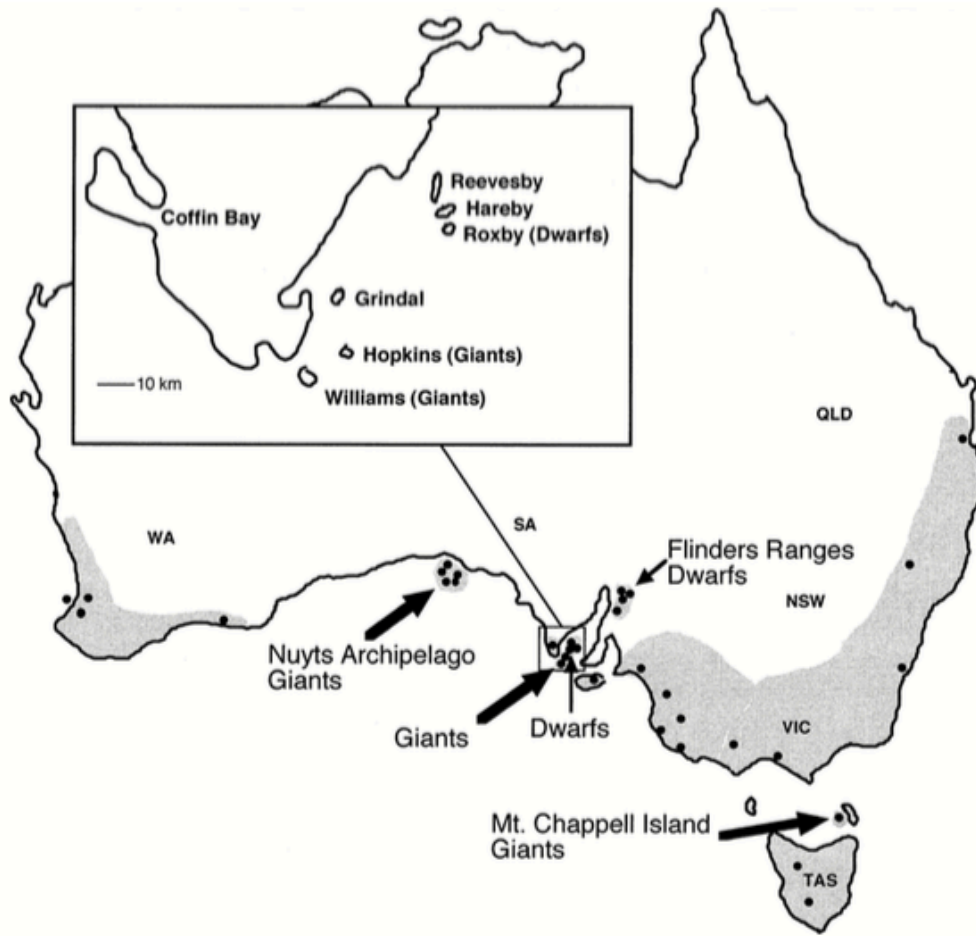

380

381 Figure 1. Map of Australia showing Tiger Snake populations sampled in this study

382 (redrawn from Keogh *et al.* 2005).

### Tiger snake samples from South Australia

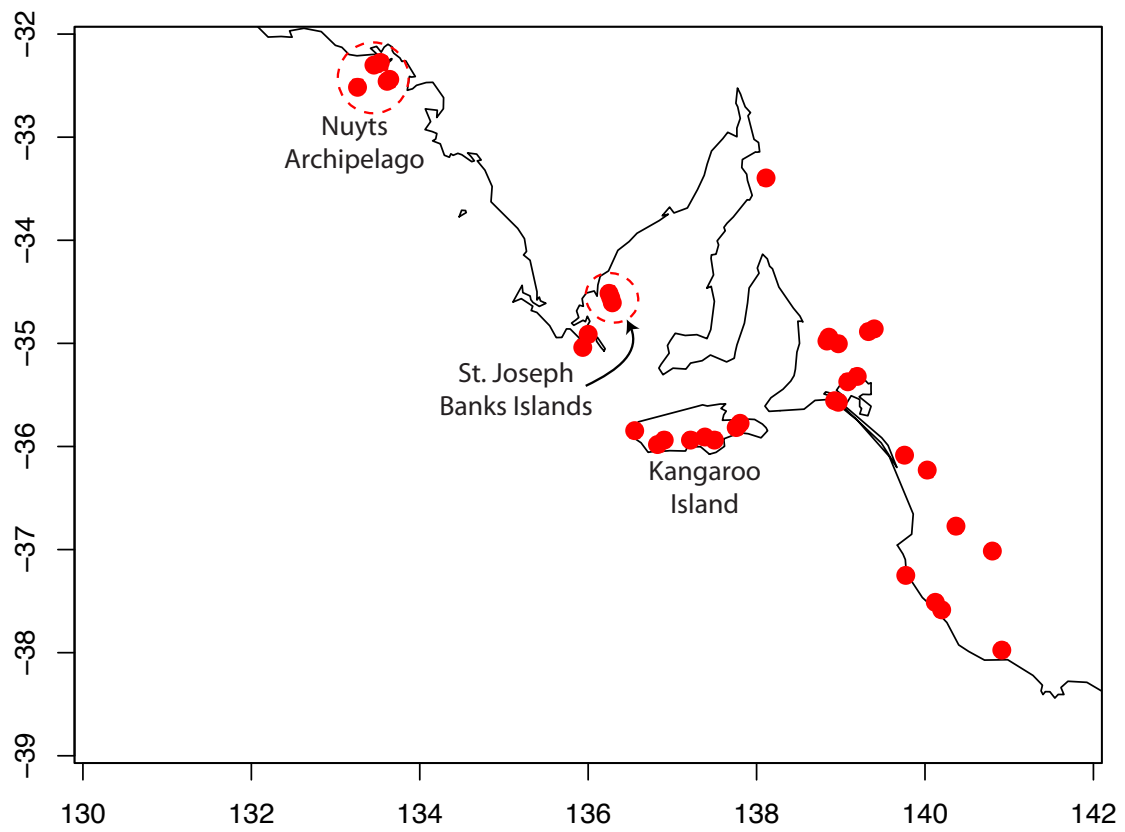

383

384 Figure 2. Map of South Australia showing sampling locations and island groups.

385

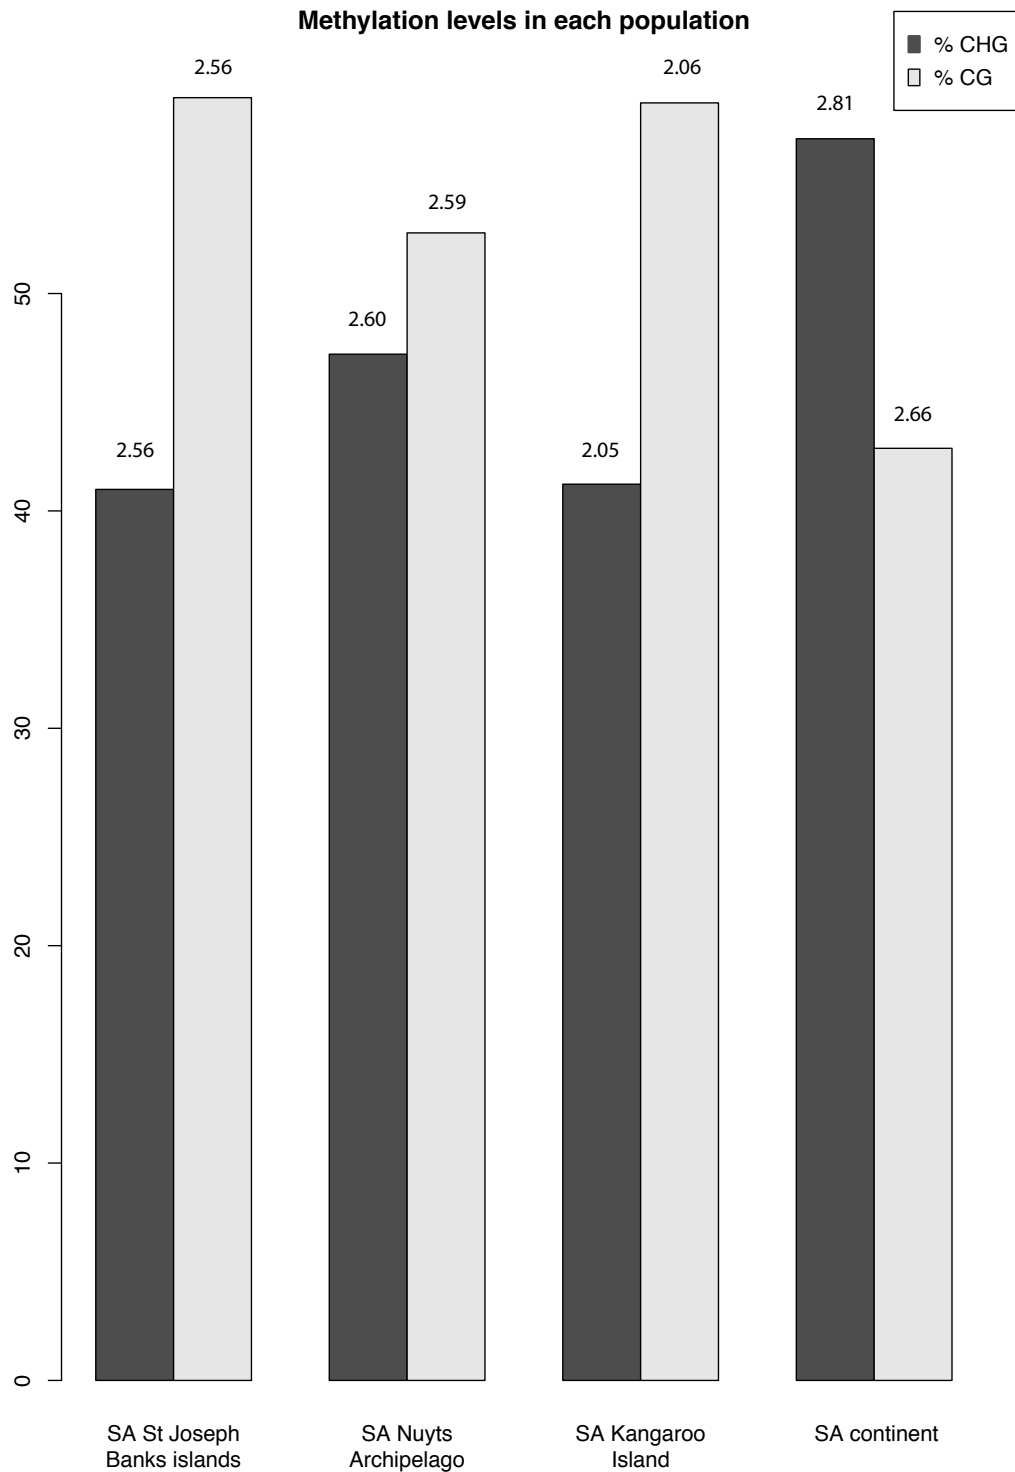

386

387 Figure 3. Histogram of CG and CHG methylation levels as a percentage of the total  
388 methylated fragments in the South Australia mainland vs. island Tiger Snakes. Values  
389 on top of the histogram bars are the Shannon Diversity Indices for within-population  
390 epigenetic diversity ( $H_{pop}$ ).

391

### PCoA of AFLP for Tiger Snakes

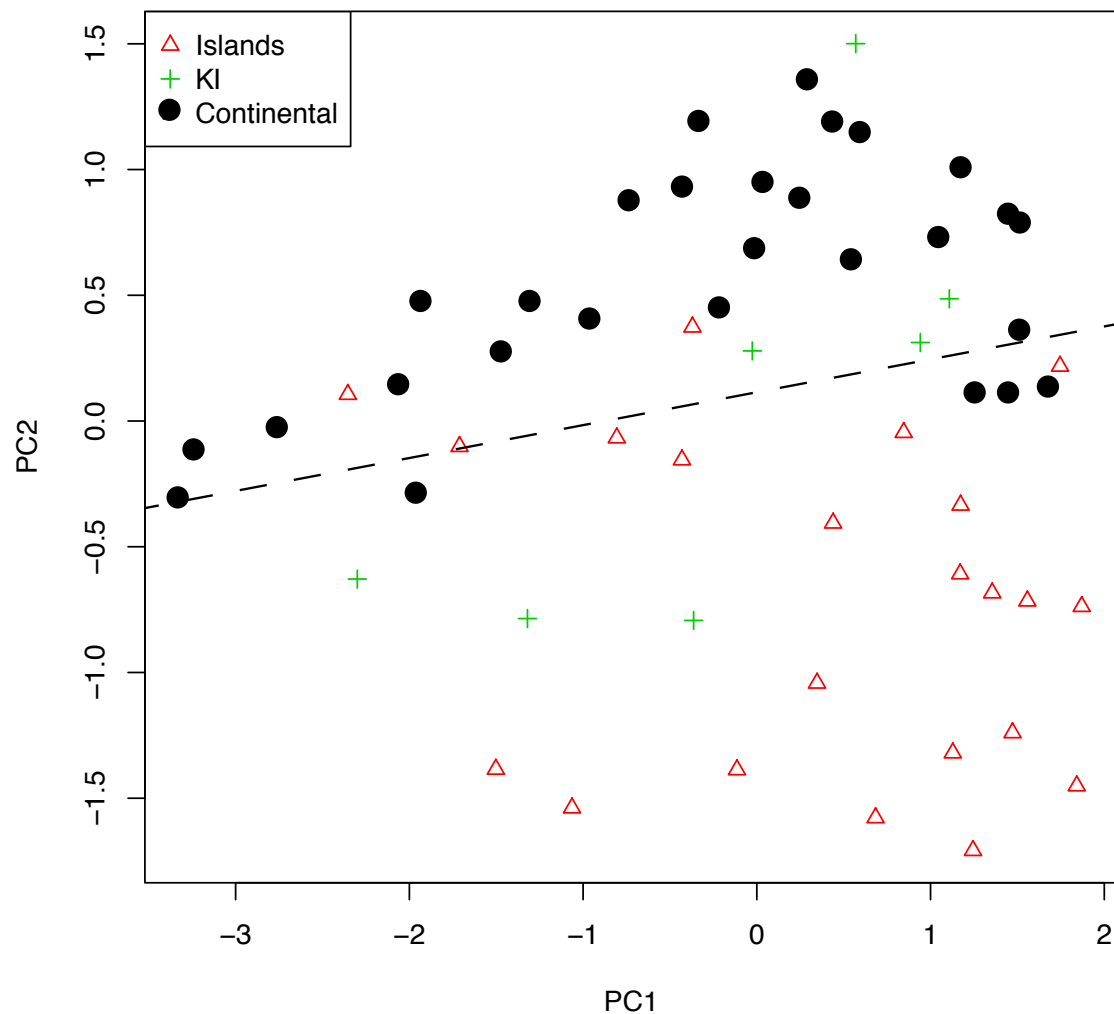

392

393 Figure 4. Principal co-ordinate analysis of genetic data (AFLP) for all Tiger Snake

394 samples, showing the major differentiation in PC2 of mainland (black circles) vs.

395 island (red triangles) populations. Some Kangaroo island samples (green crosses) fall

396 with the island populations but others fall with the mainland samples.

397

398

### PCoA of AFLP for SA Tiger Snakes

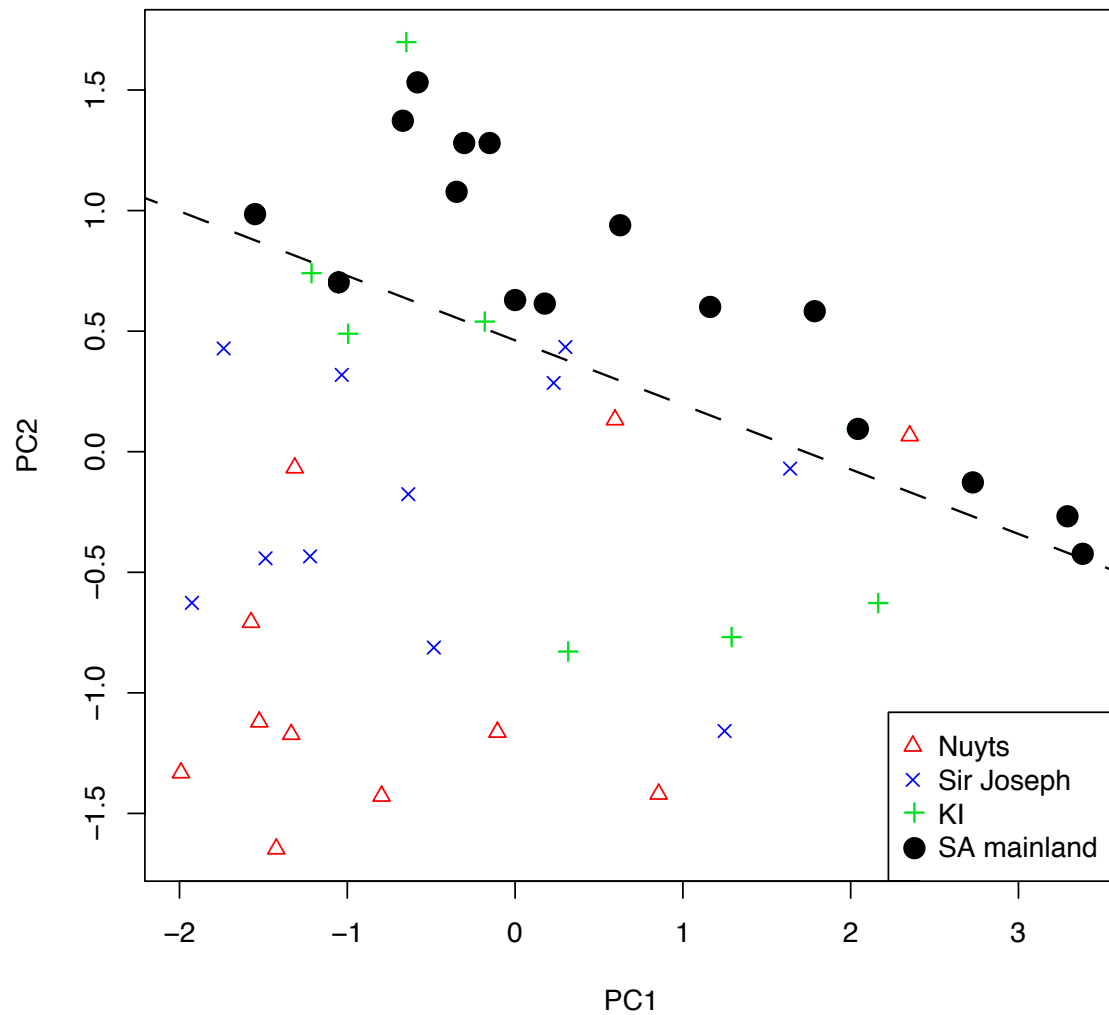

399  
400 Figure 5. Principal co-ordinate analysis of genetic data (AFLP) for South Australian  
401 Tiger Snake samples only (n=59), showing the major differentiation in PC2 of  
402 mainland (green plus sign) vs. Sir Joseph Banks island group (blue cross) vs. Nuyts  
403 Archipelago (red triangle) populations. Again, some Kangaroo island samples (black  
404 circle) fall with the other two island group populations but others fall with the  
405 mainland samples.

### PCoA of MSAP using HpaII for Tiger Snakes

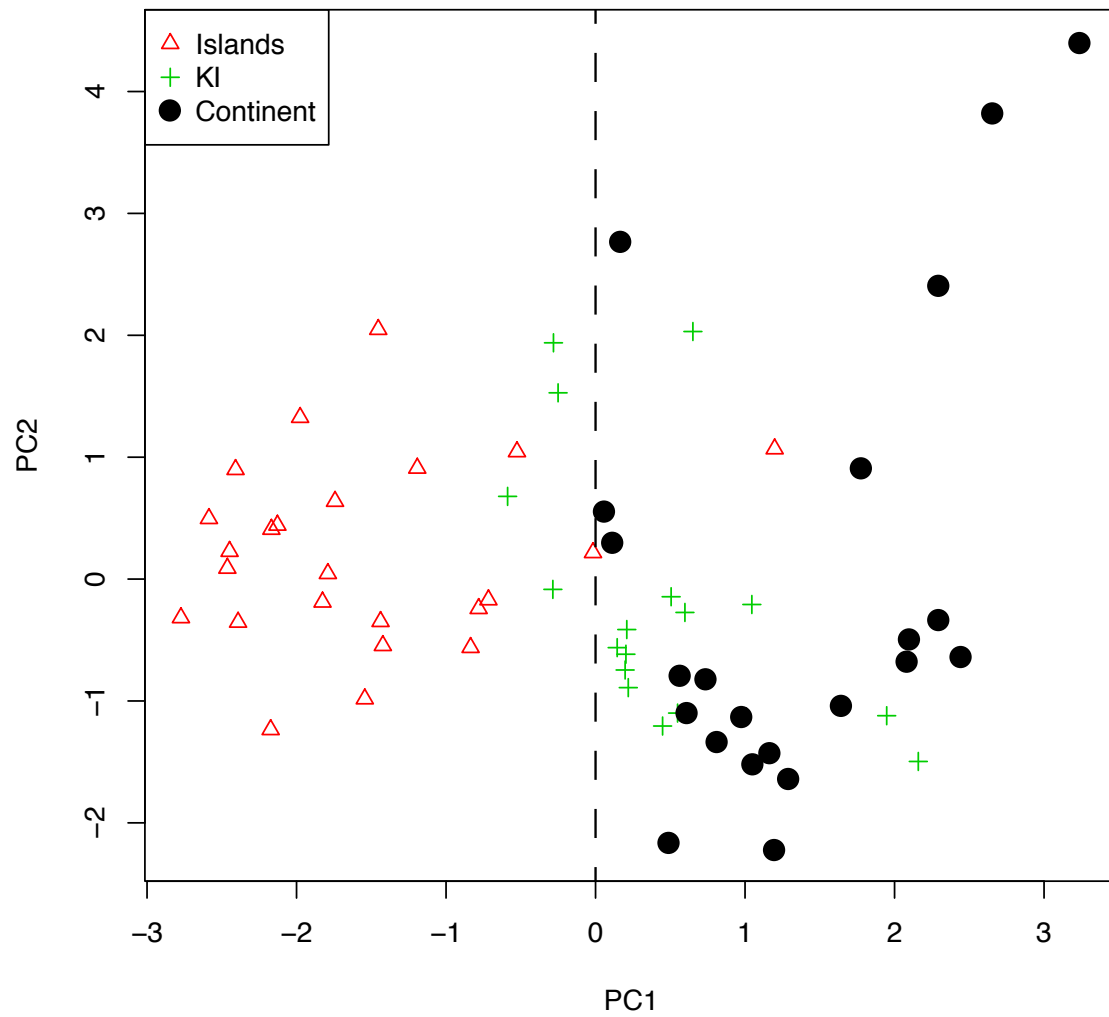

406

407 Figure 6. Principal co-ordinate analysis of the epigenetic markers (*HpaII*) for all the

408 Tiger Snake samples (n=70), showing the first and second principal components.

### PCoA of MSAP using HpaII for SA Tiger Snakes

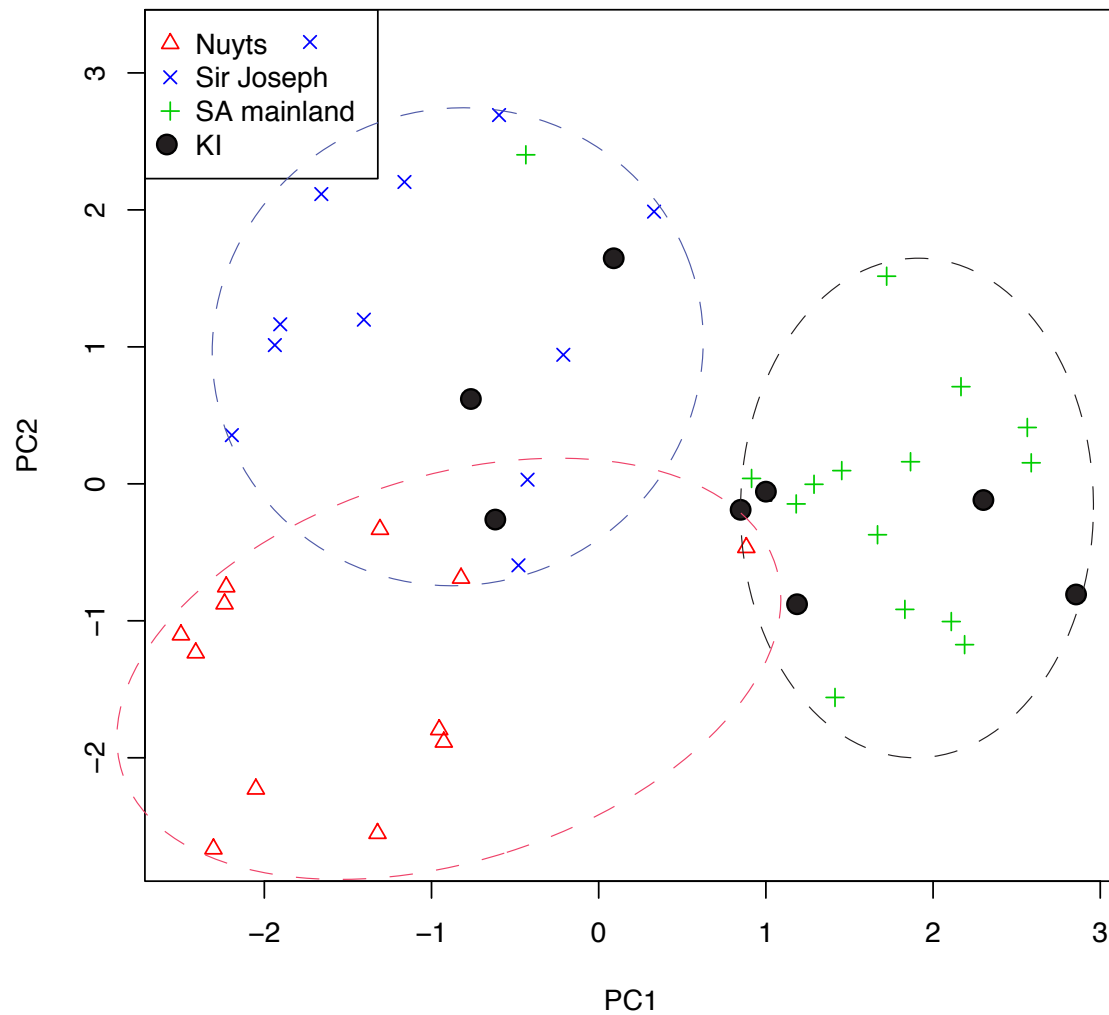

409

410 Figure 7. Principal co-ordinate analysis (PCoA) of the MSAP markers for the Tiger  
411 Snake samples from South Australia (n=51), showing the first and second principal  
412 co-ordinates. PC1 values from this PCoA were used in the mantel and correlation tests  
413 to assess the relationships between the epigenetic/genetic signal and bioclimatic  
414 variables.

### PCoA of MSAP using HpaII for Tiger Snakes

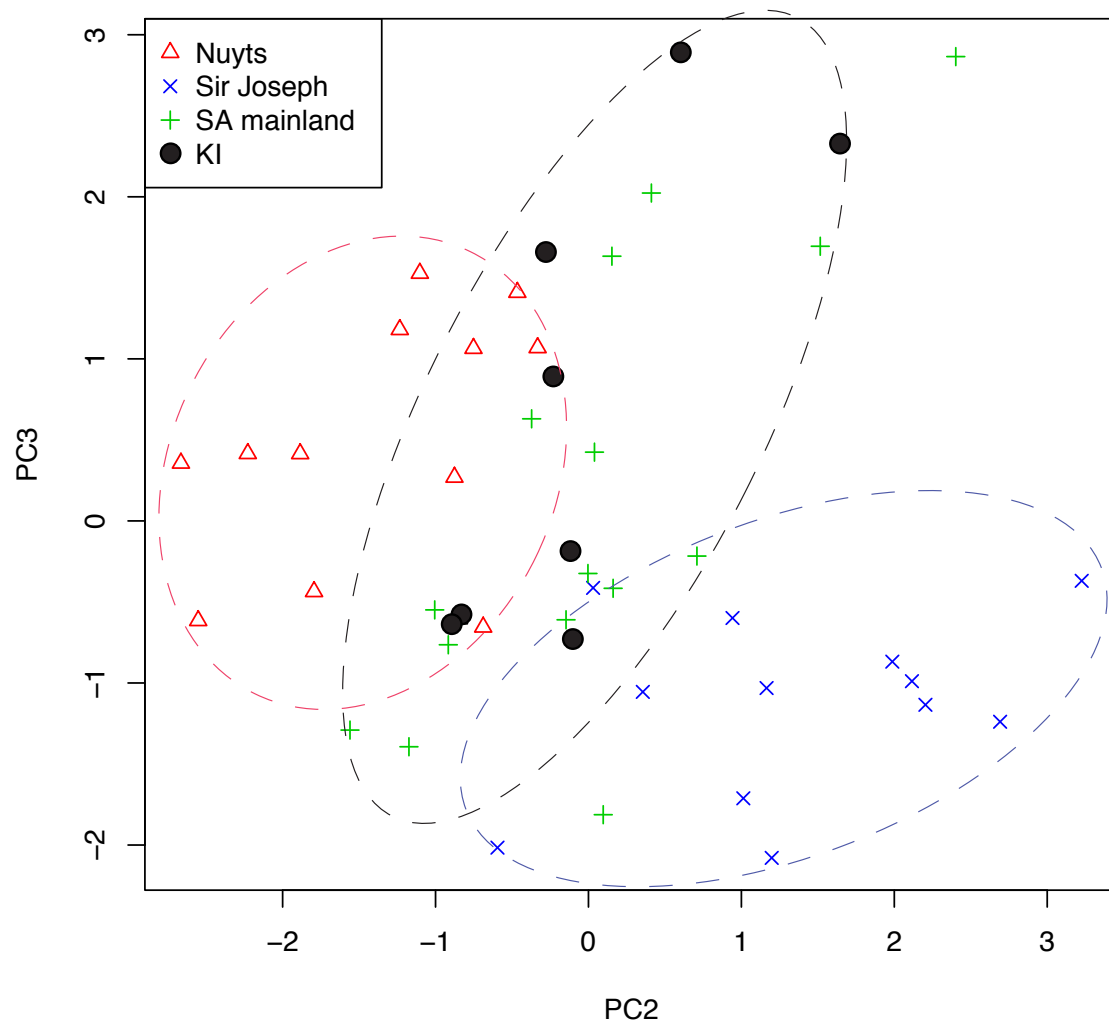



420

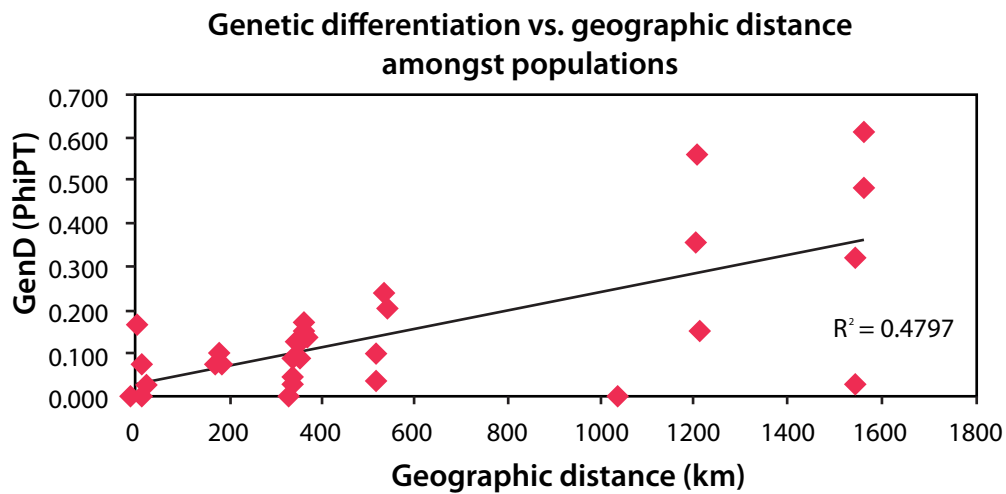

421

422 Figure 9. Mantel test of genetic differentiation against geographic distance amongst

423 all the populations (mantel p-value = 0.010).

424

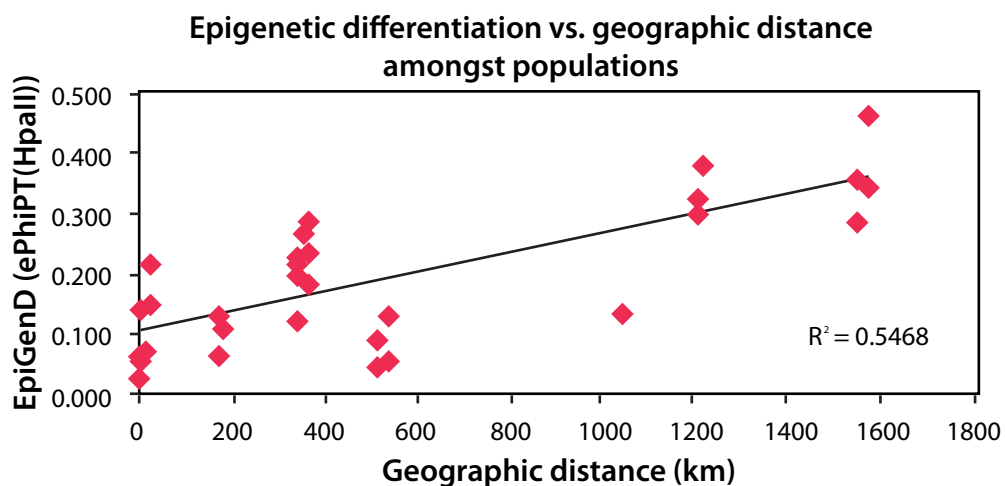

425

426 Figure 10. Mantel test of epigenetic differentiation against geographic distance

427 amongst all the populations (mantel p-value = 0.010).

428

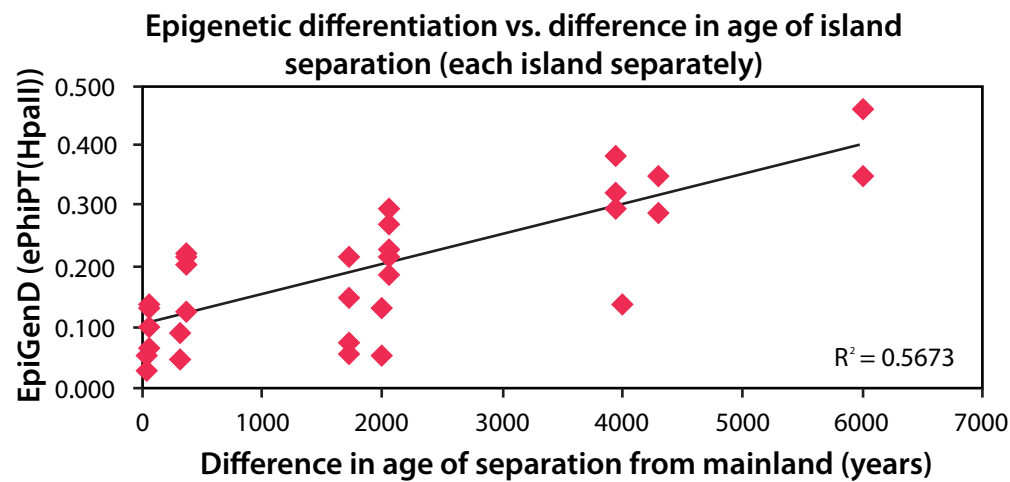

429

430 Figure 11. Mantel test of epigenetic differentiation against time since isolation

431 between all the populations (mantel p-value < 0.001).

432

433

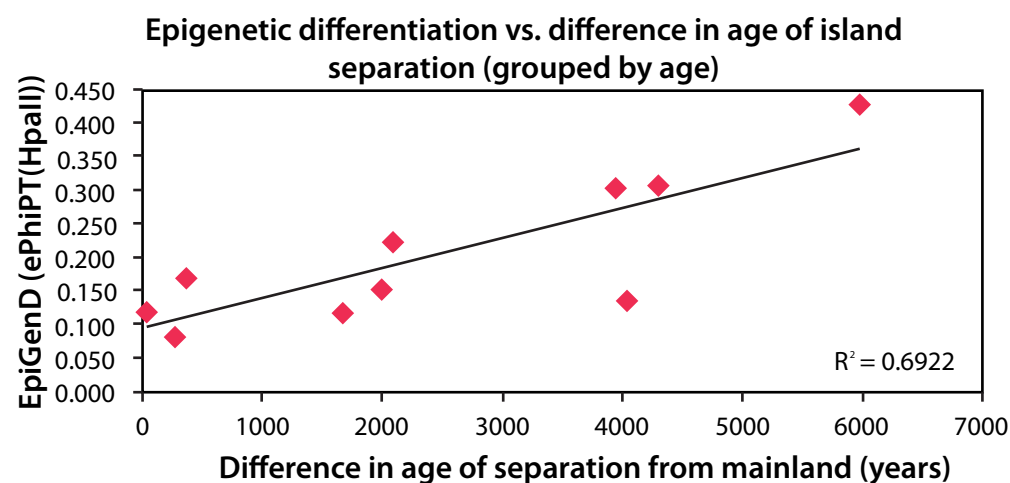

434

435 Figure 12. Mantel test of epigenetic differentiation against time since isolation

436 between all the populations grouped by age (mantel p-value = 0.015).

437

438

439

440

441

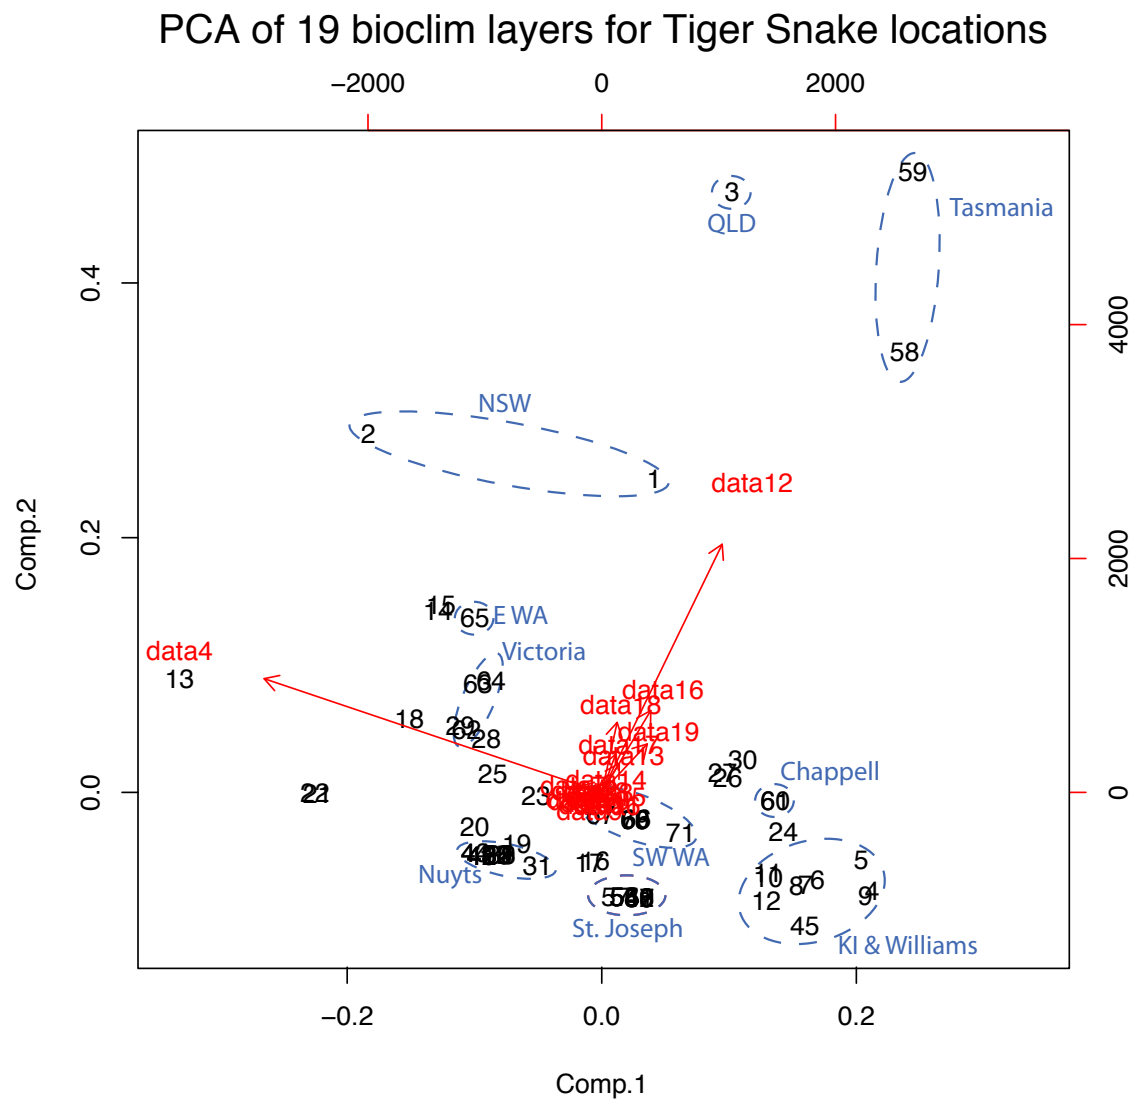

442

443 Figure 13. Principal component analysis (PCA) of 19 bioclimatic layer values for the  
444 all Tiger Snake sampling locations. The climate layer responsible for most of the  
445 variation in principal component 1 is BIO4, which is temperature seasonality, and the  
446 climate layer responsible for most of the variation in principal component 2 is BIO12,  
447 which is annual precipitation.

448

449

## PCA of climate data for SA Tiger Snake samples

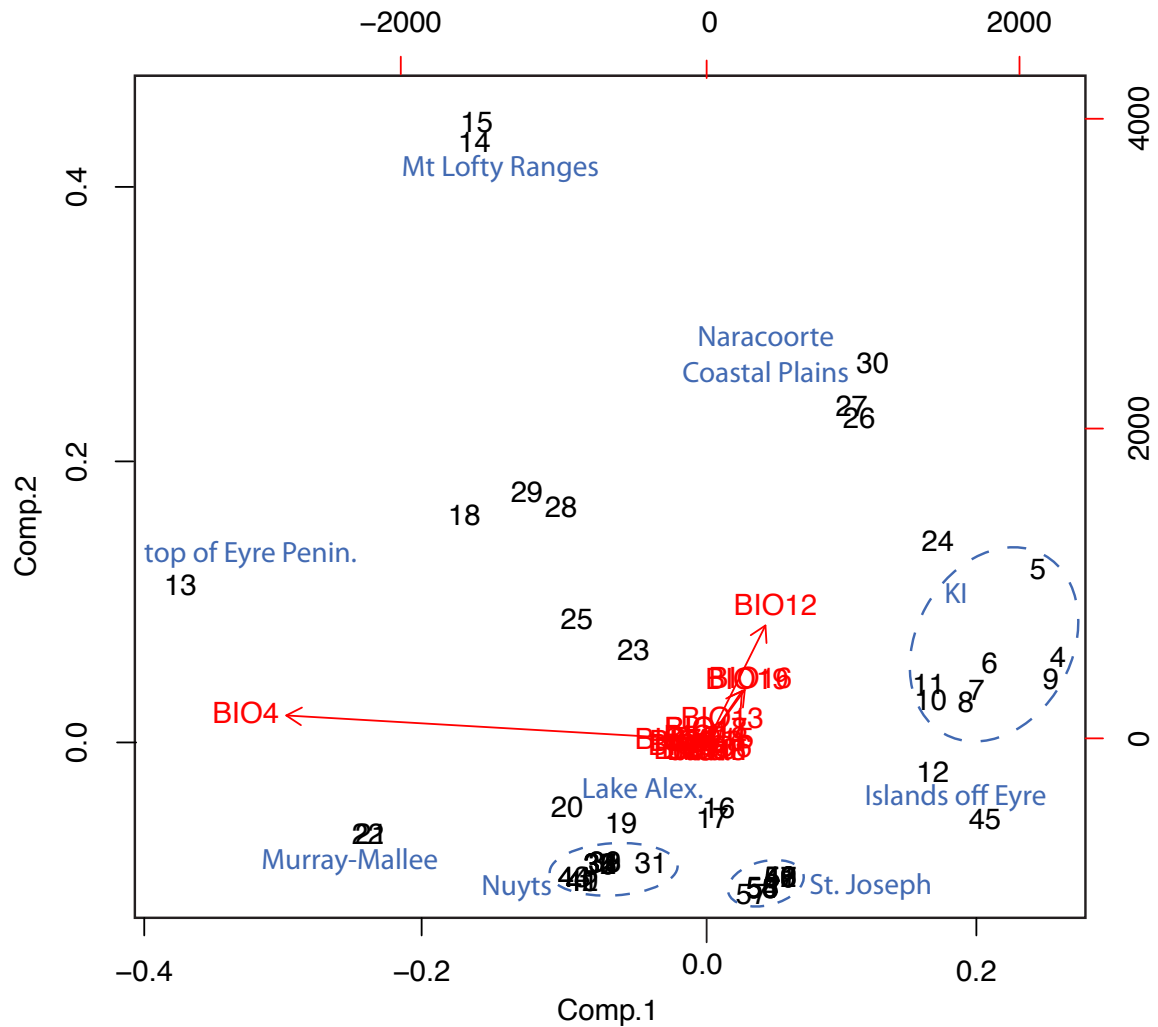

450  
451 Figure 14. Principal component analysis (PCA) of 19 bioclimatic layer values for the  
452 South Australia Tiger Snake sampling locations. The climate layer responsible for  
453 most of the variation in principal component 1 is BIO4, which is temperature  
454 seasonality, and the climate layer responsible for most of the variation in principal  
455 component 2 is BIO12, which is annual precipitation.  
456

### Relationship between pairwise distance matrices of PCoA1 from HpaII dataset of SA samples vs. Bio1: Annual mean temperature

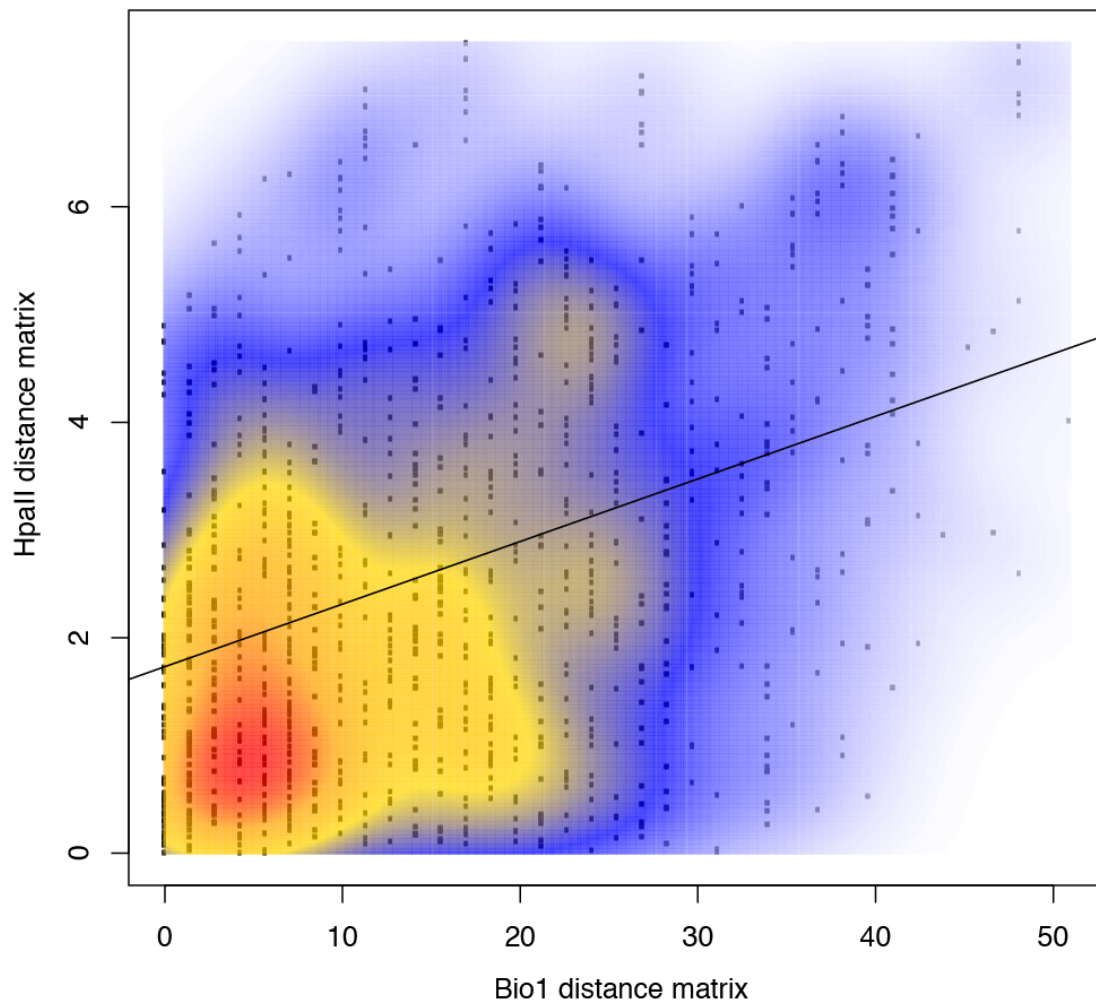

457  
458 Figure 15. Mantel test showing correlation between pairwise distance matrix of *HpaII*  
459 PCoA1 values and pairwise distance matrix of Bio1 variables (Annual mean  
460 temperature) for Tiger Snakes from South Australian locations. The correlation is  
461 significantly different from random, with a p-value of 0.001 (Bonferroni corrected p-  
462 value of 5% significance level is 0.0026).  
463

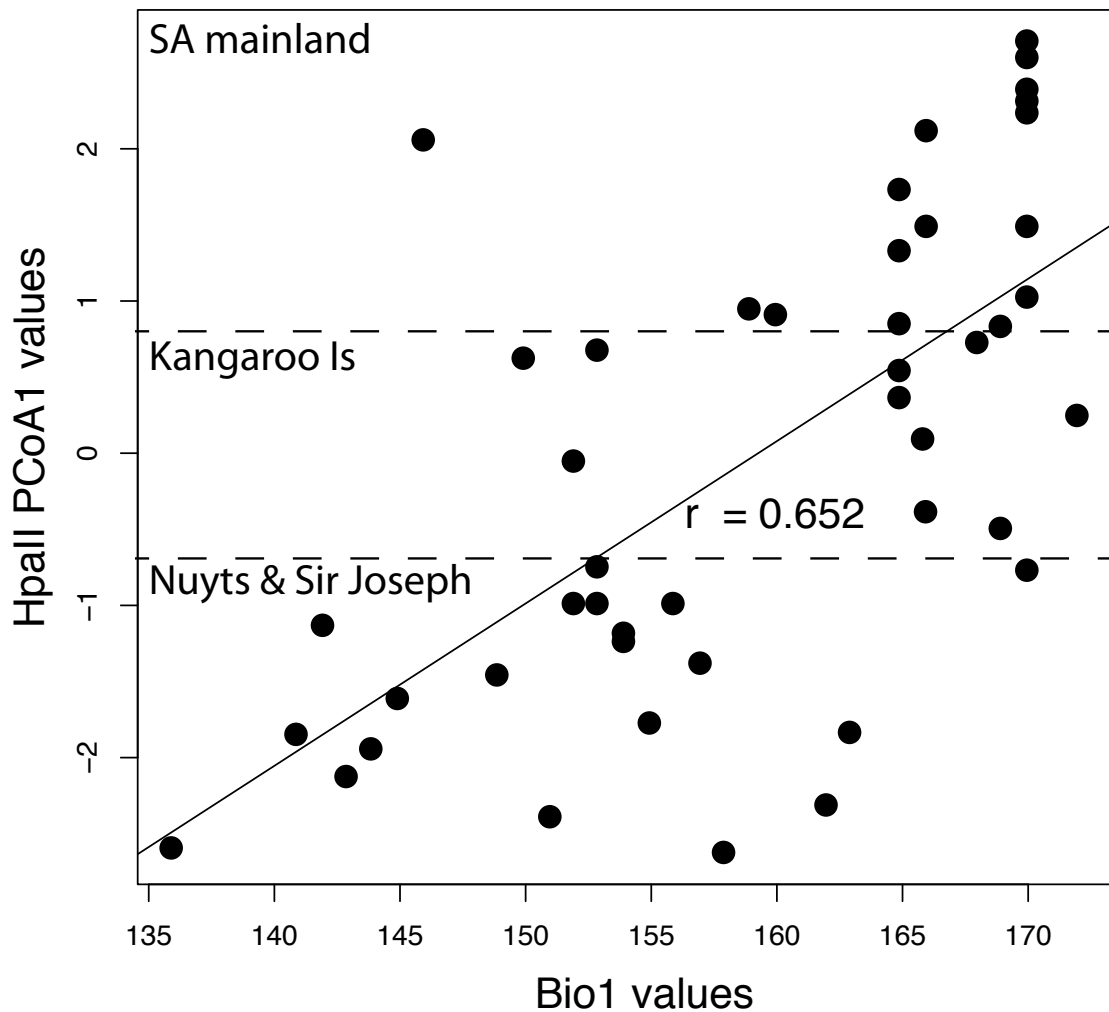

464

465 Figure 16. Scatterplot of raw *HpaII* PCoA1 values vs. Bio1 (annual mean

466 temperature) values for Tiger Snakes from South Australian (SA) locations. The

467 horizontal dashed lines roughly separate out the SA mainland Tiger Snakes, from

468 those on Kangaroo Island, and those on islands in the Nuyts Archipelago and Sir

469 Joseph Banks Island group. The SA mainland samples generally experience higher

470 annual mean temperatures ( $\sim 15.7$ — $17.3$  °C) compared to Tiger Snakes on the Nuyts

471 Archipelago and Sir Joseph Banks islands ( $\sim 13.5$ — $16.3$  °C), which appears to be

472 related to their genetic/epigenetic profiles (*HpaII* PCoA1 values). The Pearson

473 correlation coefficient ( $r = 0.652$ ) shows a strong positive linear correlation.

474

475

### Relationship between pairwise distance matrices of PCoA1 from HpaII dataset of SA samples vs. Bio14: Precipitation of Driest Month

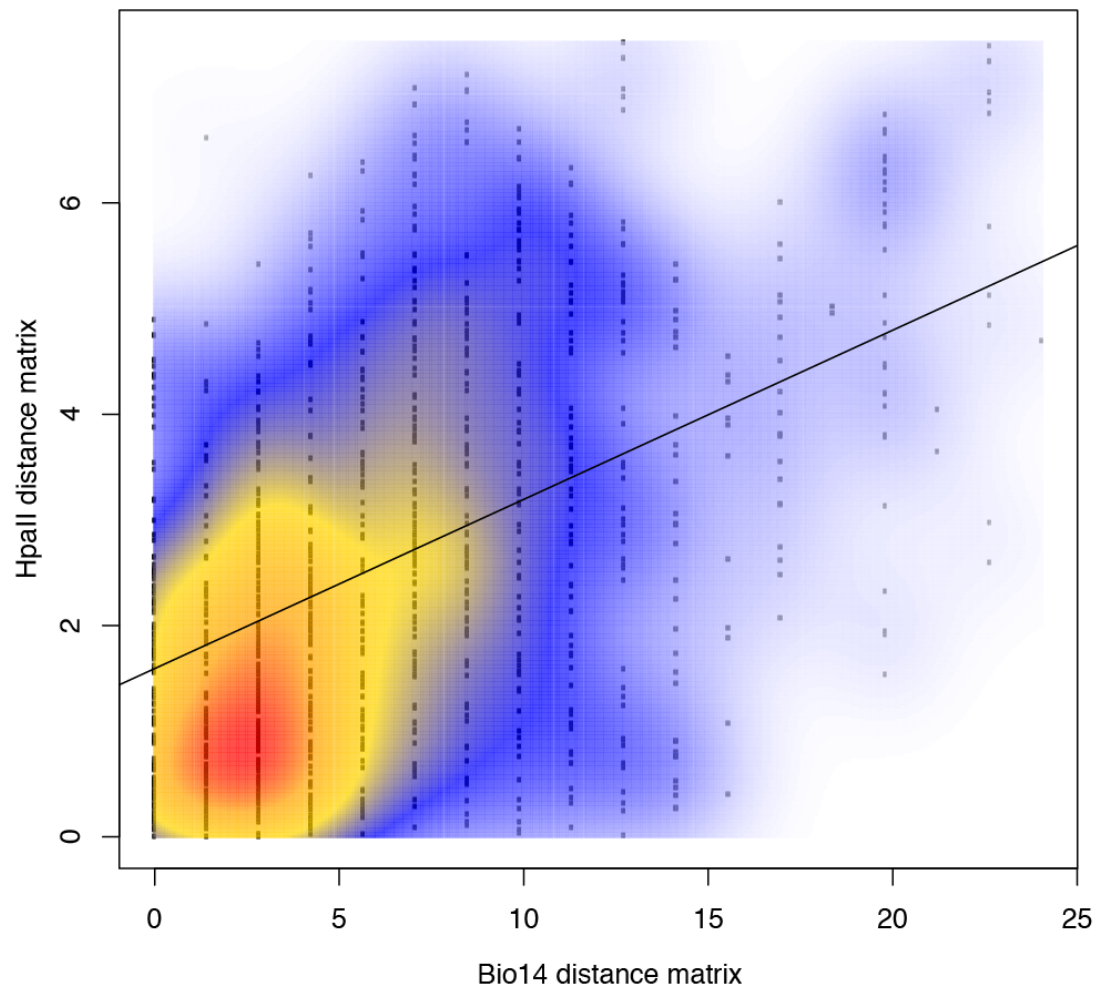

476  
477 Figure 17. Mantel test showing correlation between pairwise distance matrix of *HpaII*  
478 PCoA1 values and pairwise distance matrix of Bio14 variables (precipitation of the  
479 driest month) for Tiger Snakes from South Australian locations. The correlation is  
480 significantly different from random, with a p-value of 0.001 (Bonferroni corrected p-  
481 value of 5% significance level is 0.0026).

482  
483  
484  
485

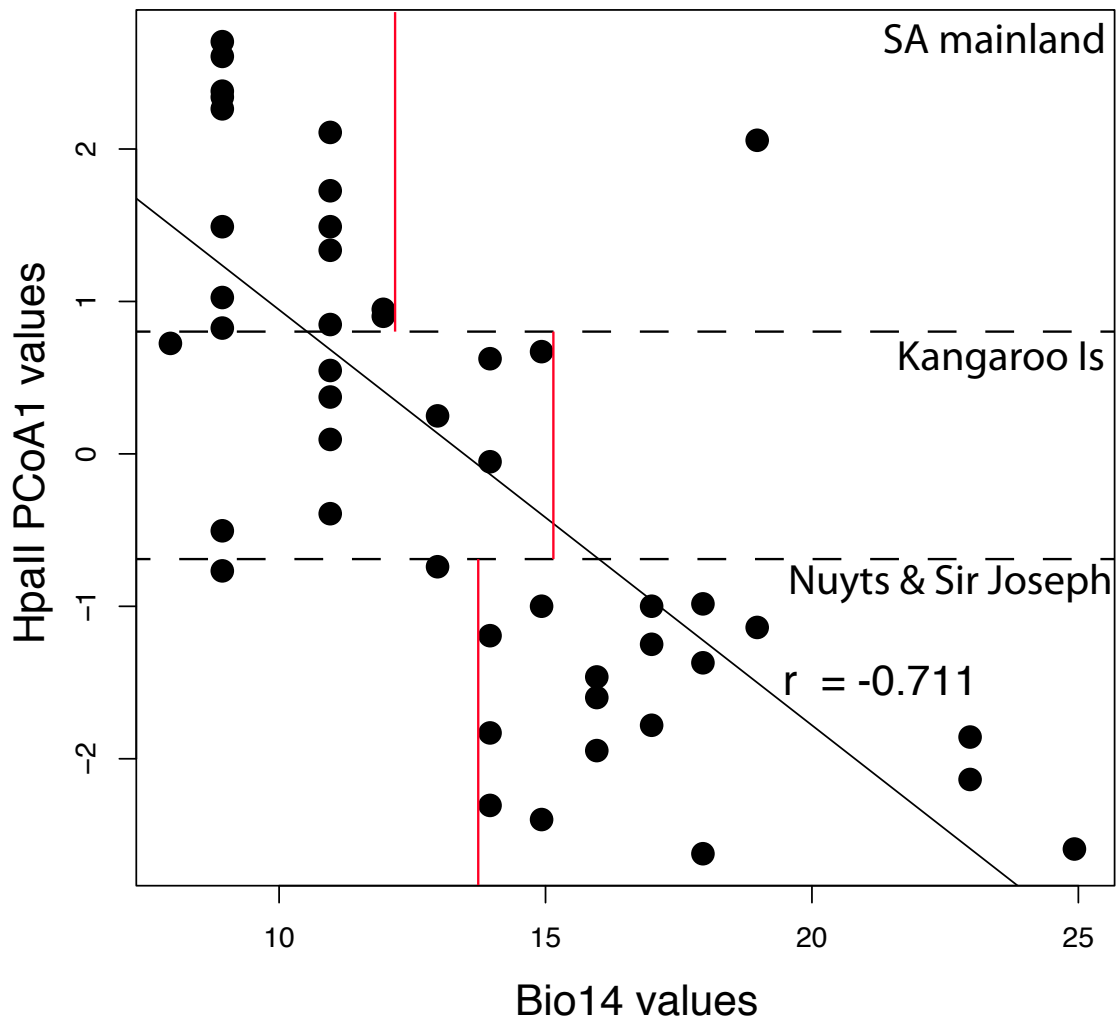

486

487 Figure 18. Scatterplot of raw *HpaII* PCoA1 values vs. Bio14 (precipitation of the  
488 driest month) values for Tiger Snakes from South Australian (SA) locations. The  
489 horizontal dashed lines roughly separate out the SA mainland Tiger Snakes, from  
490 those on Kangaroo Island, and those on islands in the Nuyts Archipelago and Sir  
491 Joseph Banks Island group. The SA mainland samples generally experience lower  
492 precipitation levels in the driest month (< ~12mm) compared to Tiger Snakes on the  
493 Nuyts Archipelago and Sir Joseph Banks islands (> ~12mm), which appears to be  
494 related to their genetic/epigenetic profiles (*HpaII* PCoA1 values). The Pearson  
495 correlation coefficient ( $r = -0.711$ ) shows a strong negative linear correlation.

496



497

**Table 1.** Oligonucleotide Sequences used for MSAP

| Oligo Name                        | Step                  | Sequence                    |
|-----------------------------------|-----------------------|-----------------------------|
| <i>HpaII/MspI</i> Adapter (F)     |                       | 5' GACGATGAGTCCTGAG 3'      |
| <i>HpaII/MspI</i> Adapter (R)     |                       | 3' CGCTCAGGACTCAT 5'        |
| <i>EcoRI</i> Adapter (F)          |                       | 5' CTCGTAGACTGCGTACC 3'     |
| <i>EcoRI</i> Adapter (R)          | Restriction/ Ligation | 3' AATTGGTACGCAGTCTAC<br>3' |
| <i>MseI</i> Adapter (F)           |                       |                             |
| <i>MseI</i> Adapter (R)           |                       |                             |
| Pre-Selective Primer              |                       | 5' GATGAGTCCTGAGCGGC        |
| <i>HpaII/MspI</i>                 |                       | 3'                          |
| Pre-Selective Primer <i>EcoRI</i> | Pre-amplification     | 5' GACTGCGTACCAATTCA 3'     |
| Pre-Selective Primer <i>MseI</i>  |                       |                             |
|                                   |                       | 5'                          |
| <i>HpaII</i> Selective Primer     |                       | GATGAGTCCTGAGCGGCCA         |
|                                   | Selective             | 3'                          |
| <i>EcoRI</i> Selective Primer     | amplification         |                             |
| <i>EcoRI</i> Selective Primer     |                       | 5'<br>GACTGCGTACCAATTCATG   |

3'

*MseI* Selective Primer

---

498

499

500 Table 2. Each type of methylation as a percentage of fragments genotyped for the SA  
 501 populations.

| Island                | CHG % | CG % | Methylation %<br>(CHG + CG) |
|-----------------------|-------|------|-----------------------------|
| Continent (n=16)      | 10    | 13   | 22                          |
| Goat_Island (n=3)     | 17    | 10   | 26                          |
| Franklin Island (n=6) | 11    | 13   | 24                          |
| St Peter Island (n=2) | 12    | 14   | 26                          |
| Hareby Island (n=4)   | 14    | 13   | 27                          |
| Reevesby Island (n=5) | 14    | 13   | 28                          |
| Roxby Island (n=2)    | 13    | 17   | 30                          |

502

503 Table 3. Shannon Diversity indices used to estimate the within-population epigenetic  
 504 diversity ( $H_{pop}$ ).

|                                     | SA<br>mainland | Nuyts<br>Archipelago | Sir Joseph<br>Islands | Kangaroo<br>Island | Species-<br>level |
|-------------------------------------|----------------|----------------------|-----------------------|--------------------|-------------------|
| Shannon<br>diversity index<br>(CHG) | 2.8188         | 2.6003               | 2.5536                | 2.0440             | 3.9222            |
| Shannon<br>diversity index<br>(CG)  | 2.6625         | 2.5764               | 2.5584                | 2.0425             | 3.8699            |

505

506

507

508 Table 4. Measures of genetic distance for the AFLP data between the South  
 509 Australian populations, with values below the diagonal pairwise representing Nei's  
 510 genetic distance and above the diagonal are pairwise PhiPT (asterisk shows those  
 511 values significant at the 5% level after 9999 permutations).

|            | KI<br>(n=7) | Mainland<br>(n=17) | Nuyts<br>(n=12) | Sir Joseph<br>(n=11) |
|------------|-------------|--------------------|-----------------|----------------------|
| KI         | -           | 0.024              | 0.124 *         | 0.080 *              |
| Mainland   | 0.034       | -                  | 0.166 *         | 0.090 *              |
| Nuyts      | 0.061       | 0.072              | -               | 0.041                |
| Sir Joseph | 0.050       | 0.047              | 0.031           | -                    |

512

513 Table 5. The coefficient of epigenetic differentiation was computed as  $Gst = (Hsp -$   
 514  $Hpop)/Hsp$  where Hsp is the within-species epigenetic diversity.

| Gst | Mainland    | Island      |
|-----|-------------|-------------|
| CHG | 0.281311102 | 0.100645628 |
| CG  | 0.311996072 | 0.091400959 |

515

516

517 Table 6. Measures of epigenetic distance for the *HpaII* data between the South  
 518 Australian populations, with values below the diagonal pairwise representing Nei's  
 519 genetic distance and above the diagonal are pairwise PhiPT (asterisk shows those  
 520 values significant at the 5% level after 9999 permutations).

|            | KI<br>(n=5) | Mainland<br>(n=17) | Nuyts<br>(n=12) | Sir Joseph<br>(n=7) |
|------------|-------------|--------------------|-----------------|---------------------|
| KI         | -           | 0.030 *            | 0.087 *         | 0.114 *             |
| Mainland   | 0.036       | -                  | 0.108 *         | 0.120 *             |
| Nuyts      | 0.051       | 0.049              | -               | 0.113 *             |
| Sir Joseph | 0.056       | 0.051              | 0.046           | -                   |

521

522 Table 7. Measures of epigenetic distance for the *MspI* data between the populations,  
 523 with values below the diagonal pairwise representing Nei's genetic distance and  
 524 above the diagonal are pairwise PhiPT (asterisk shows those values significant at the  
 525 5% level).

|            | KI<br>(n=7) | Mainland<br>(n=17) | Nuyts<br>(n=12) | Sir Joseph<br>(n=11) |
|------------|-------------|--------------------|-----------------|----------------------|
| KI         | -           | 0.097 *            | 0.090 *         | 0.083 *              |
| Mainland   | 0.055       | -                  | 0.067 *         | 0.106 *              |
| Nuyts      | 0.050       | 0.037              | -               | 0.061 *              |
| Sir Joseph | 0.047       | 0.050              | 0.035           | -                    |

526

527

528 Table 8. Correlation between genetic/epigenetic distance (*Hpa*II PCoA1 pairwise  
 529 distance matrix) and bioclimatic variables (pairwise distance matrix) for each SA  
 530 sample.

| Variable                                    | Mantel test p-value | Pearson correlation coefficient | Mainland values  | Nuyts Archipelago & Sir Joseph Banks Island values |
|---------------------------------------------|---------------------|---------------------------------|------------------|----------------------------------------------------|
| <b>Bio1: Annual mean temp (°C)</b>          | <b>0.001**</b>      | <b>0.652</b>                    | <b>&gt; 15.8</b> | <b>&lt; 16.3</b>                                   |
| Bio2: Mean Diurnal Range                    | 0.779               | 0.083                           |                  |                                                    |
| Bio3: Isothermality (BIO2/BIO7) (* 100)     | 0.115               | 0.261                           |                  |                                                    |
| Bio4: Temperature Seasonality               | 0.574               | -0.015                          |                  |                                                    |
| Bio5: Max Temperature of Warmest Month      | 0.578               | 0.174                           |                  |                                                    |
| Bio6: Min Temperature of Coldest Month      | 0.068               | 0.215                           |                  |                                                    |
| Bio7: Temperature Annual Range (BIO5-BIO6)  | 0.737               | 0.018                           |                  |                                                    |
| Bio8: Mean Temperature of Wettest Quarter   | 0.001**             | 0.458                           | > 12.0           | < 13.5                                             |
| Bio9: Mean Temperature of Driest Quarter    | 0.002*              | 0.469                           |                  |                                                    |
| Bio10: Mean Temperature of Warmest Quarter  | 0.002*              | 0.478                           |                  |                                                    |
| Bio11: Mean Temperature of Coldest Quarter  | 0.001**             | 0.598                           | > 12.0           | < 12.2                                             |
| Bio12: Annual Precipitation (mm)            | 0.001**             | -0.506                          | < 540            | 280—800                                            |
| Bio13: Precipitation of Wettest Month       | 0.008               | -0.371                          |                  |                                                    |
| <b>Bio14: Precipitation of Driest Month</b> | <b>0.001**</b>      | <b>-0.711</b>                   | <b>&lt; 12</b>   | <b>&gt; 14</b>                                     |
| Bio15: Precipitation Seasonality            | 0.111               | 0.186                           |                  |                                                    |
| Bio16: Precipitation of Wettest Quarter     | 0.008               | -0.405                          |                  |                                                    |
| Bio17: Precipitation of Driest Quarter (mm) | 0.001**             | -0.691                          | < 46             | > 47                                               |

|                                         |         |        |         |        |
|-----------------------------------------|---------|--------|---------|--------|
| Bio18: Precipitation of Warmest Quarter | 0.001** | -0.677 | < 47    | > 48   |
| Bio19: Precipitation of Coldest Quarter | 0.001** | -0.411 | 125—240 | 80—330 |

531 One asterisk (\*) signifies Bonferroni corrected p-values less than 5% significance  
532 level (0.0026), with two asterisks (\*\*) representing Bonferroni corrected p-values less  
533 than 2.5% significance level (0.0013).  
534
